# Supplementary material for: Conservation policy and the measurement of forests
Source: Springer Nature journal article supplement (doi:10.1038/nclimate2816), 2015-10-05
Supplement: 41558_2016_BFnclimate2816_MOESM399_ESM.pdf [file 41558_2016_BFnclimate2816_MOESM399_ESM.pdf]

# Conservation policy and the measurement of forests

Table S1. Difference in forest area and affected carbon stock and value in REDD countries.

|                                 | Country                    | Area<br>km <sup>2</sup> | Forest (>10% tree) |                 | Forest (>30% tree) |                 | Forest –area difference |                 | Affected Carbon Stock* | Affected Carbon Value** |
|---------------------------------|----------------------------|-------------------------|--------------------|-----------------|--------------------|-----------------|-------------------------|-----------------|------------------------|-------------------------|
|                                 |                            |                         | %                  | km <sup>2</sup> | %                  | km <sup>2</sup> | %                       | km <sup>2</sup> | Gt C                   | Billion USD             |
|                                 |                            |                         |                    |                 |                    |                 |                         |                 |                        |                         |
| Asia-Pacific                    | Bangladesh                 | 122,681                 | 64.59              | 79,237          | 64.59              | 20,877          | 17.02                   | 58,360          | 0.22                   | 5.16                    |
|                                 | Cambodia                   | 170,951                 | 74.76              | 127,801         | 74.76              | 74,578          | 43.63                   | 53,223          | 0.32                   | 7.40                    |
|                                 | Mongolia                   | 1,544,968               | 5.18               | 80,098          | 5.18               | 31,912          | 2.07                    | 48,185          | no data                | -                       |
|                                 | Sri Lanka                  | 64,752                  | 80.62              | 52,205          | 80.62              | 37,246          | 57.52                   | 14,959          | 0.09                   | 2.13                    |
|                                 | Vietnam                    | 306,384                 | 83.48              | 255,761         | 83.48              | 168,995         | 55.16                   | 86,766          | 0.55                   | 12.72                   |
|                                 | Indonesia                  | 1,874,123               | 96.88              | 1,815,606       | 96.88              | 1,620,701       | 86.48                   | 194,904         | 1.32                   | 30.28                   |
|                                 | Papua New Guinea           | 459,772                 | 99.14              | 455,810         | 99.14              | 427,286         | 92.93                   | 28,524          | 0.23                   | 5.37                    |
|                                 | Philippines                | 288,889                 | 96.83              | 279,742         | 96.83              | 227,365         | 78.70                   | 52,377          | 0.35                   | 7.97                    |
|                                 | Solomon Islands            | 27,974                  | 99.84              | 27,928          | 99.84              | 27,645          | 98.83                   | 283             | 0.00                   | 0.00                    |
|                                 | Bhutan                     | 39,506                  | 78.08              | 30,848          | 78.08              | 27,072          | 68.53                   | 3,776           | 0.05                   | 1.04                    |
|                                 | Lao PDR                    | 228,465                 | 92.98              | 212,429         | 92.98              | 185,747         | 81.30                   | 26,682          | 0.23                   | 5.28                    |
|                                 | Myanmar                    | 661,517                 | 76.10              | 503,436         | 76.10              | 391,941         | 59.25                   | 111,494         | 0.87                   | 19.94                   |
|                                 | Nepal                      | 145,904                 | 57.76              | 84,276          | 57.76              | 42,408          | 29.07                   | 41,868          | 0.39                   | 8.86                    |
|                                 | Pakistan                   | 862,208                 | 3.39               | 29,222          | 3.39               | 7,539           | 0.87                    | 21,683          | 0.11                   | 2.43                    |
| Malaysia                        | 328,417                    | 98.69                   | 324,114            | 98.69           | 308,768            | 94.02           | 15,346                  | 0.15            | 3.36                   |                         |
| Latin America and the Caribbean | Argentina                  | 2,734,289               | 23.10              | 631,596         | 23.10              | 203,109         | 7.43                    | 428,487         | 0.92                   | 21.06                   |
|                                 | Bolivia                    | 1,070,758               | 67.64              | 724,217         | 67.64              | 540,903         | 50.52                   | 183,313         | 0.60                   | 13.81                   |
|                                 | Colombia                   | 1,129,470               | 90.89              | 1,026,608       | 90.89              | 714,077         | 63.22                   | 312,531         | 1.45                   | 33.37                   |
|                                 | Ecuador                    | 254,507                 | 87.27              | 222,096         | 87.27              | 145,384         | 57.12                   | 76,712          | 0.36                   | 8.37                    |
|                                 | Panama                     | 74,474                  | 92.48              | 68,876          | 92.48              | 45,042          | 60.48                   | 23,834          | 0.16                   | 3.62                    |
|                                 | Paraguay                   | 397,957                 | 79.81              | 317,591         | 79.81              | 109,066         | 27.41                   | 208,525         | 0.52                   | 12.06                   |
|                                 | Chile                      | 726,278                 | 42.36              | 307,633         | 42.36              | 210,179         | 28.94                   | 97,454          | 0.32                   | 7.37                    |
|                                 | Guyana                     | 210,367                 | 94.27              | 198,319         | 94.27              | 181,872         | 86.46                   | 16,446          | 0.14                   | 3.27                    |
|                                 | Peru                       | 1,282,078               | 64.70              | 829,452         | 64.70              | 739,188         | 57.66                   | 90,264          | 0.50                   | 11.56                   |
|                                 | Suriname                   | 143,832                 | 99.69              | 143,388         | 99.69              | 139,575         | 97.04                   | 3,812           | 0.03                   | 0.68                    |
|                                 | Costa Rica                 | 51,036                  | 99.23              | 50,642          | 99.23              | 44,696          | 87.58                   | 5,946           | 0.04                   | 0.98                    |
|                                 | Guatemala                  | 107,977                 | 96.17              | 103,846         | 96.17              | 80,168          | 74.25                   | 23,678          | 0.11                   | 2.62                    |
|                                 | Honduras                   | 111,410                 | 96.89              | 107,945         | 96.89              | 79,208          | 71.10                   | 28,737          | 0.12                   | 2.73                    |
|                                 | Mexico                     | 1,941,119               | 47.05              | 913,232         | 47.05              | 479,316         | 24.69                   | 433,916         | 1.09                   | 25.12                   |
| Africa                          | Republic of Congo          | 341,132                 | 82.20              | 280,405         | 82.20              | 232,176         | 68.06                   | 48,229          | 0.27                   | 6.12                    |
|                                 | Côte d'Ivoire              | 320,426                 | 69.08              | 221,358         | 69.08              | 43,162          | 13.47                   | 178,196         | 0.78                   | 17.95                   |
|                                 | Dem. Republic of the Congo | 2,298,465               | 88.94              | 2,044,287       | 88.94              | 1,541,624       | 67.07                   | 502,663         | 2.19                   | 50.38                   |
|                                 | Nigeria                    | 903,298                 | 21.10              | 190,564         | 21.10              | 39,040          | 4.32                    | 151,524         | 0.71                   | 16.32                   |
|                                 | Tanzania                   | 884,206                 | 49.78              | 440,198         | 49.78              | 107,682         | 12.18                   | 332,516         | 1.12                   | 25.80                   |
|                                 | Zambia                     | 740,386                 | 70.04              | 518,539         | 70.04              | 157,371         | 21.26                   | 361,168         | 1.34                   | 30.93                   |
|                                 | Benin                      | 115,463                 | 21.82              | 25,193          | 21.82              | 399             | 0.35                    | 24,794          | 0.06                   | 1.35                    |
|                                 | Cameroon                   | 463,339                 | 79.15              | 366,720         | 79.15              | 224,047         | 48.35                   | 142,673         | 0.75                   | 17.31                   |
| Central African Republic        | 622,036                    | 76.07                   | 473,157            | 76.07           | 117,596            | 18.91           | 355,561                 | 1.47            | 33.77                  |                         |

|                       |                   |       |                   |       |                   |       |                  |              |               |
|-----------------------|-------------------|-------|-------------------|-------|-------------------|-------|------------------|--------------|---------------|
| Chad                  | 1,269,325         | 2.47  | 31,293            | 2.47  | 31                | 0.00  | 31,262           | 0.07         | 1.54          |
| Equatorial Guinea     | 26,823            | 98.82 | 26,507            | 98.82 | 24,922            | 92.91 | 1,585            | 0.02         | 0.49          |
| Ethiopia              | 1,123,760         | 22.45 | 252,304           | 22.45 | 51,238            | 4.56  | 201,066          | 0.72         | 16.62         |
| Gabon                 | 261,076           | 94.50 | 246,720           | 94.50 | 229,507           | 87.91 | 17,213           | 0.19         | 4.46          |
| Ghana                 | 233,147           | 41.03 | 95,660            | 41.03 | 31,923            | 13.69 | 63,737           | 0.29         | 6.67          |
| Guinea Bissau         | 33,084            | 74.42 | 24,620            | 74.42 | 6,947             | 21.00 | 17,673           | 0.06         | 1.41          |
| Kenya                 | 583,922           | 10.85 | 63,372            | 10.85 | 18,649            | 3.19  | 44,723           | 0.13         | 3.05          |
| Madagascar            | 588,110           | 39.77 | 233,868           | 39.77 | 139,508           | 23.72 | 94,360           | 0.36         | 8.25          |
| Malawi                | 94,624            | 47.75 | 45,179            | 47.75 | 12,739            | 13.46 | 32,440           | 0.11         | 2.49          |
| South Sudan           | 625,037           | 49.93 | 312,093           | 49.93 | 8,308             | 1.33  | 303,785          | 0.72         | 16.65         |
| Republic of the Sudan | 1,871,440         | 0.38  | 7,070             | 0.38  | 11                | 0.00  | 7,060            | 0.02         | 0.38          |
| Tunisia               | 154,531           | 1.51  | 2,326             | 1.51  | 1,397             | 0.90  | 929              | no data      | -             |
| Uganda                | 205,952           | 71.42 | 147,088           | 71.42 | 39,924            | 19.39 | 107,164          | 0.31         | 7.17          |
| Zimbabwe              | 387,583           | 18.82 | 72,926            | 18.82 | 5,514             | 1.42  | 67,412           | 0.22         | 5.13          |
| <b>Total</b>          | <b>31,509,231</b> |       | <b>16,125,400</b> |       | <b>10,345,578</b> |       | <b>5,779,822</b> | <b>23.17</b> | <b>532.80</b> |

**Table S1. Area of agreement on the class *forest* among eight global, satellite-based data sets<sup>4,8,31-36</sup>.**

| Forest<br>“votes” | Area (10 <sup>6</sup> km <sup>2</sup> ) |
|-------------------|-----------------------------------------|
| 0                 | 86.6                                    |
| 1                 | 11.2                                    |
| 2                 | 6.2                                     |
| 3                 | 5.1                                     |
| 4                 | 4.8                                     |
| 5                 | 4.6                                     |
| 6                 | 5.4                                     |
| 7                 | 7.8                                     |
| 8                 | 15.6                                    |
| Total             | 147.3                                   |
